# Supplementary material
Source: PubMed Central journal article supplement (PMC7732234)
Supplement: NIHMS1651439-supplement-supporting_Info.pdf [file NIHMS1651439-supplement-supporting_Info.pdf]

## Supplementary Information

### Comprehensive N- and O-glycosylation Mapping of Human Coagulation Factor V

Cheng Ma,<sup>1</sup> Ding Liu,<sup>1</sup> Dong Li<sup>2</sup>, Junping Zhang<sup>3</sup>, Xiao-Qian Xu<sup>4</sup>, He Zhu<sup>1</sup>, Xiu-Feng Wan,<sup>5,6,7,8,9,10</sup> Carol H. Miao,<sup>11,12</sup> Barbara A. Konkle,<sup>12,13</sup> Philip Onigman,<sup>14</sup> Weidong Xiao<sup>3\*</sup> and Lei Li<sup>1\*</sup>

<sup>1</sup>Department of Chemistry, Georgia State University, Atlanta, GA, USA

<sup>2</sup>Department of Clinical Laboratory, Shanghai Tongji Hospital, Tongji University School of Medicine, Shanghai, China

<sup>3</sup>Sol Sherry Thrombosis Research Center, Department of Microbiology and Immunology, Cardiovascular Research Center, Temple University, Philadelphia, PA, USA

<sup>4</sup>Department of Hematology, Shanghai Jiaotong University Affiliated Shanghai General Hospital, Shanghai, China

<sup>5</sup>Missouri University Center for Research on Influenza Systems Biology (CRISB), University of Missouri, Columbia, MO, USA

<sup>6</sup>Department of Molecular Microbiology and Immunology, School of Medicine, University of Missouri, Columbia, MO, USA

<sup>7</sup>Department of Electrical Engineering & Computer Science, College of Engineering, University of Missouri, Columbia, MO, USA

<sup>8</sup>Bond Life Sciences Center, University of Missouri, Columbia, MO, USA

<sup>9</sup>MU Informatics Institute, University of Missouri, Columbia, MO, USA

<sup>10</sup>Department of Pathobiology, College of Veterinary Medicine, University of Missouri, Columbia, MO, USA

<sup>11</sup>Center for Immunity and Immunotherapies, Seattle Children's Research Institute, Seattle, WA, USA

<sup>12</sup>University of Washington, Seattle, WA, USA

<sup>13</sup>Bloodworks Northwest, Seattle, WA, USA

<sup>14</sup>Genovis Inc, Cambridge, MA, USA

**Running Title:** Glycosylation of human factor V

#### Table of Contents

| Section                                                              | Pages   |
|----------------------------------------------------------------------|---------|
| I. Scheme S1. Strategy of Intact glycopeptide data analysis          | S2      |
| II. Table S1. List of identified O-glycoforms and O-glycosites of FV | S2      |
| III. Tandem MS annotation of N- and O-glycopeptide (Figure S1-S11)   | S3-S8   |
| IV. Identified N-glycopeptides in human FV                           | S9-S11  |
| V. N-glycosylation sites of human FV                                 | S12-S13 |
| VI. Identified O-glycopeptides in human FV                           | S14-S16 |

## I. Scheme S1

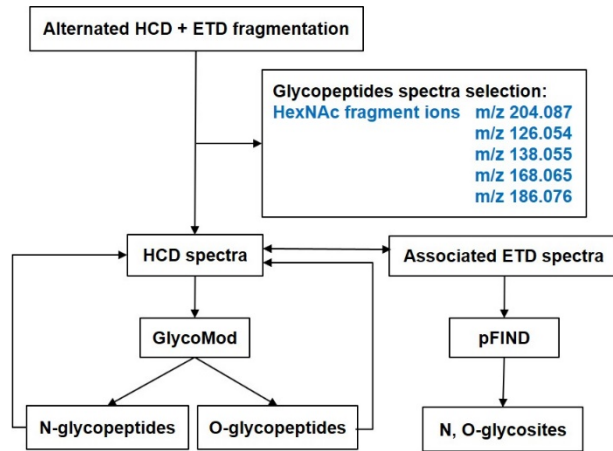

**Scheme S1.** The workflow of HCD- and ETD-MS/MS analysis.

## II. Table S1

| No. | Glycoform | Glycosite                                                                                                       | No. | Glycoform | Glycosite        |
|-----|-----------|-----------------------------------------------------------------------------------------------------------------|-----|-----------|------------------|
| 41  |           | T805, S1044, S1150                                                                                              | 50  |           | S720             |
| 42  |           | T805, S985/T986, S1044, T1047, S1053, S1150, S1926, T2053                                                       | 51  |           | T805, S1018      |
| 43  |           | T805, T898, S917, S985/T986, S1044, T1047, S1150, T1211, T1238, T1283, T1302, S1481, T1520, S1594, S1868, S1926 | 52  |           | T805, T1029      |
| 44  |           | S917, S1053                                                                                                     | 53  |           | T805, S985/T986  |
| 45  |           | S985/T986, S1053, S1150, T1211, T1238, T1283, T1302, S1594                                                      | 54  |           | S985/T986, S2090 |
| 46  |           | S1150, T1247                                                                                                    | 55  |           | S985/T986        |
| 47  |           | T805                                                                                                            | 56  |           | S2090            |
| 48  |           | T1990/T1991                                                                                                     | 57  |           | S1781            |
| 49  |           | S310                                                                                                            |     |           |                  |

List of 17 identified O-glycoforms and 26 O-glycosites from FV. ■ N-acetylglucosamine (GlcNAc), □ N-acetylgalactosamine (GalNAc), ● Galactose (Gal), ◆ N-acetylneuraminic acid (Neu5Ac), ▼ L-Fucose

### III. Tandem MS annotation of N- and O-glycopeptide

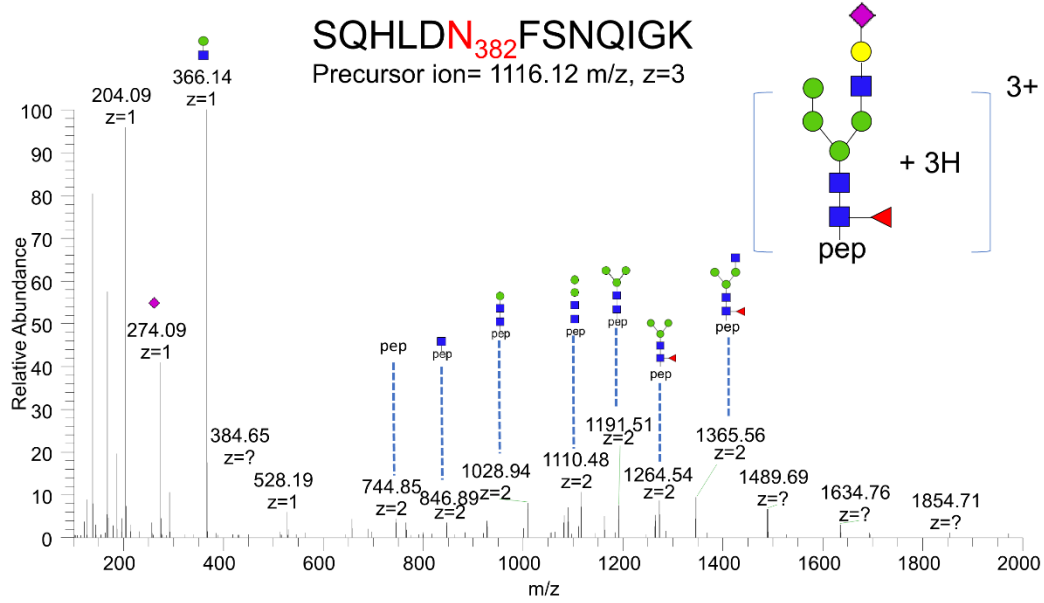

Figure S1. Tandem MS annotation of N-glycopeptide SQHLDN<sub>382</sub>FSNQIGK with hybrid type glycoform.

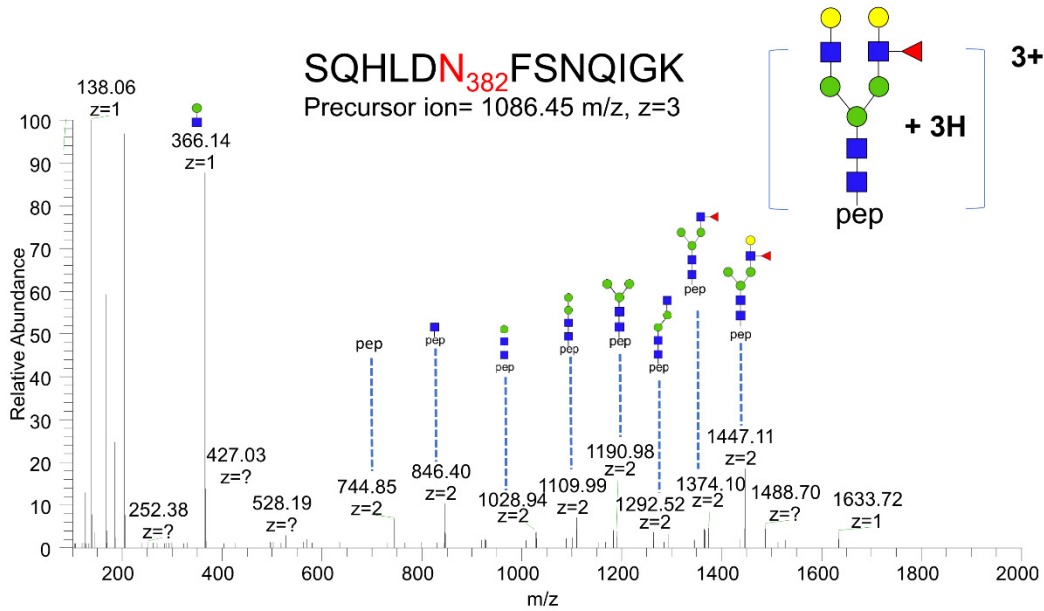

Figure S2. Tandem MS annotation of N-glycopeptide SQHLDN<sub>382</sub>FSNQIGK with complex type glycoform.

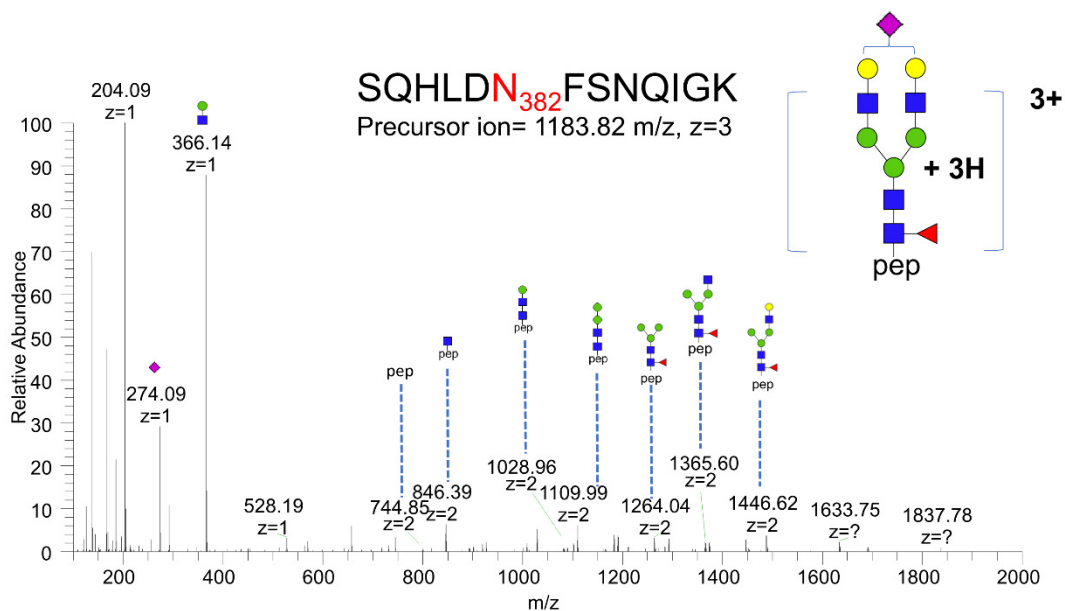

Figure S3. Tandem MS annotation of N-glycopeptide SQHLDN<sub>382</sub>FSNQIGK with sialylated complex type glycoform.

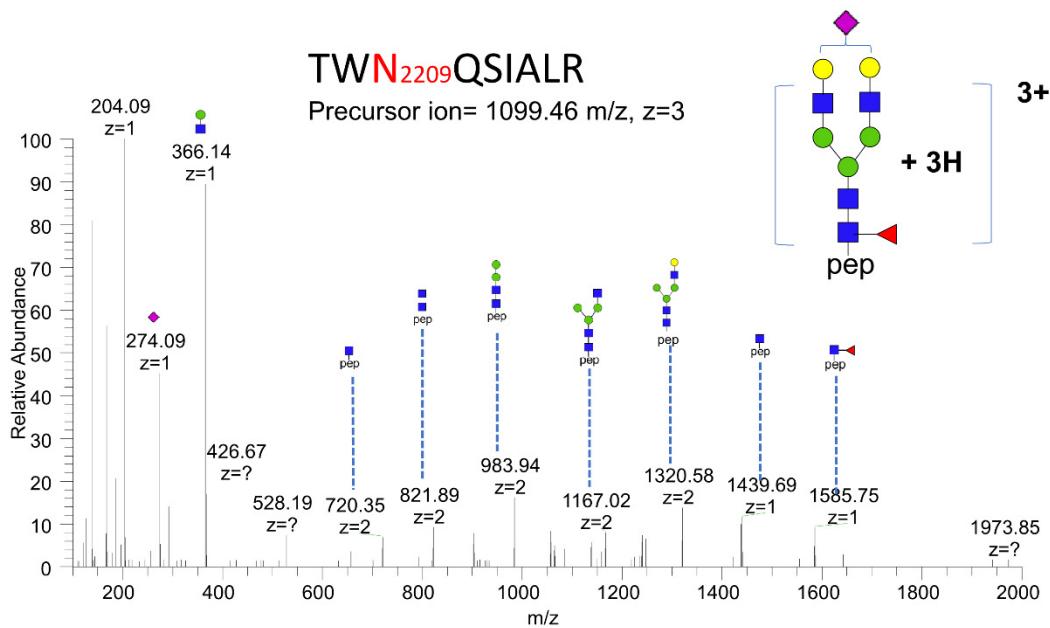

Figure S4. Tandem MS annotation of N-glycopeptide TWN<sub>382</sub>QSIALR with sialylated complex type glycoform.

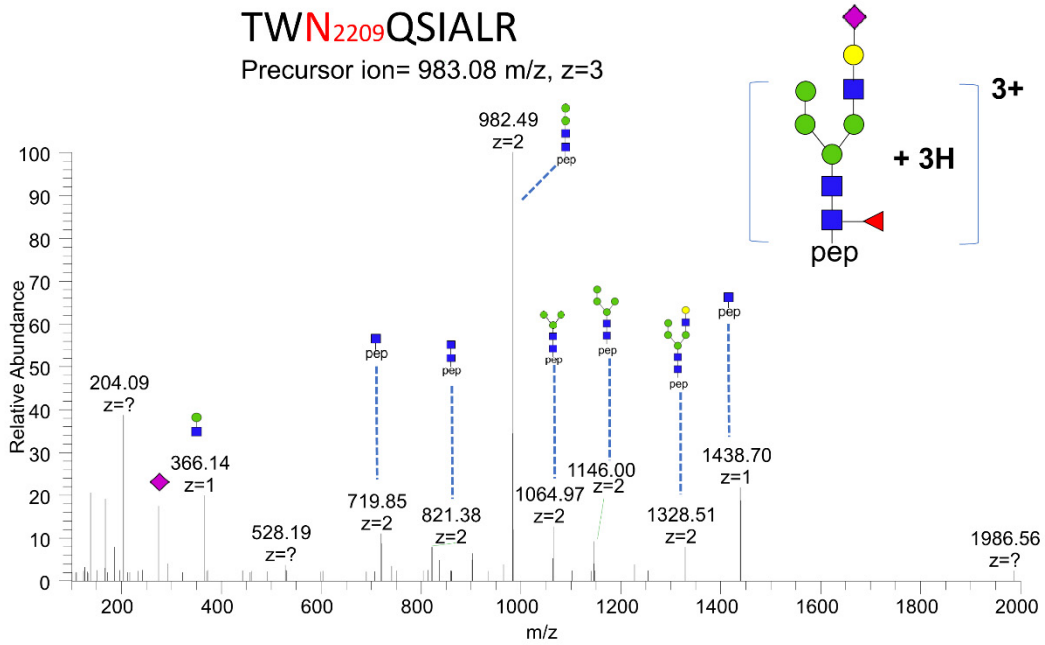

Figure S5. Tandem MS annotation of N-glycopeptide TW<sub>N</sub>382QSIALR with sialylated hybrid type glycoform.

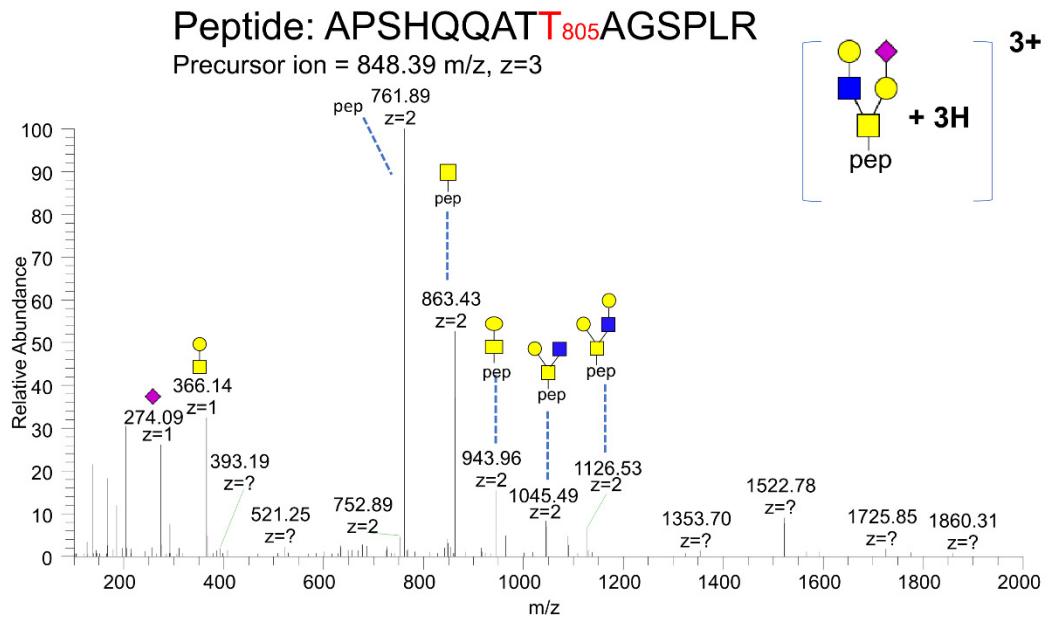

Figure S6. Tandem MS annotation of O-glycopeptide APSHQQT<sub>T</sub>805AGSPLR.

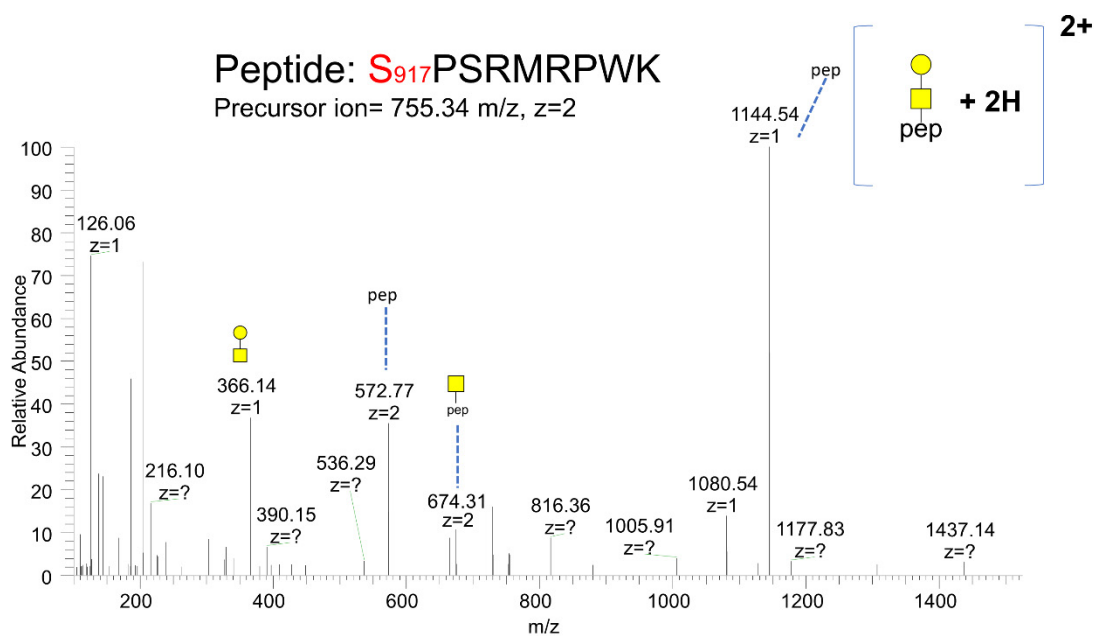

Figure S7. Tandem MS annotation of O-glycopeptide S<sub>917</sub>PSRMRPWK.

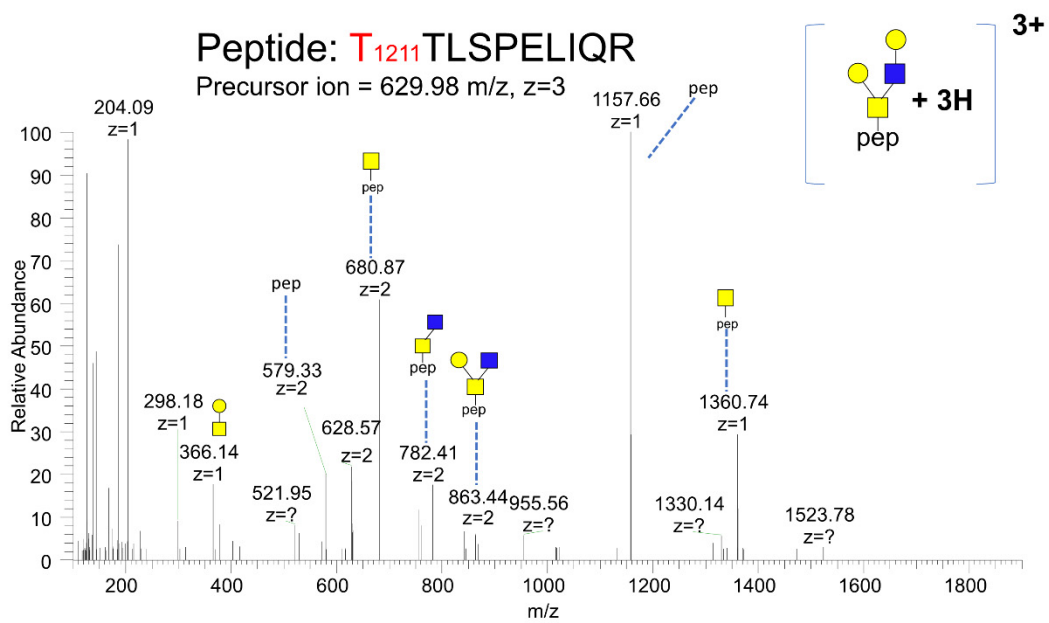

Figure S8. Tandem MS annotation of O-glycopeptide T<sub>1211</sub>TLSPELIQR.

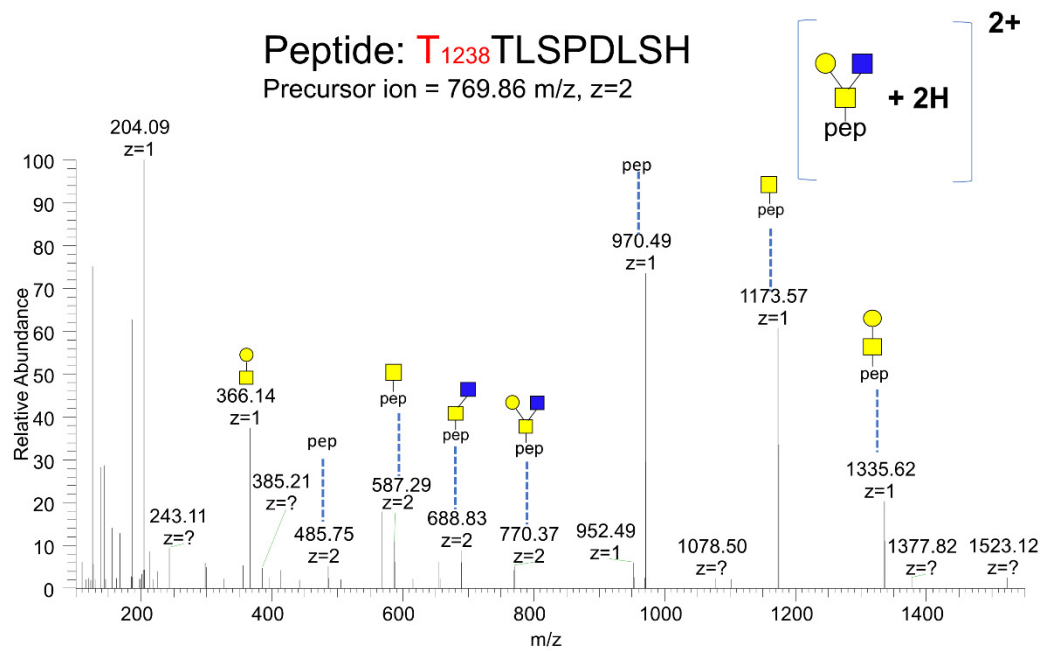

Figure S9. Tandem MS annotation of O-glycopeptide T<sub>1238</sub>TLSPDLSH.

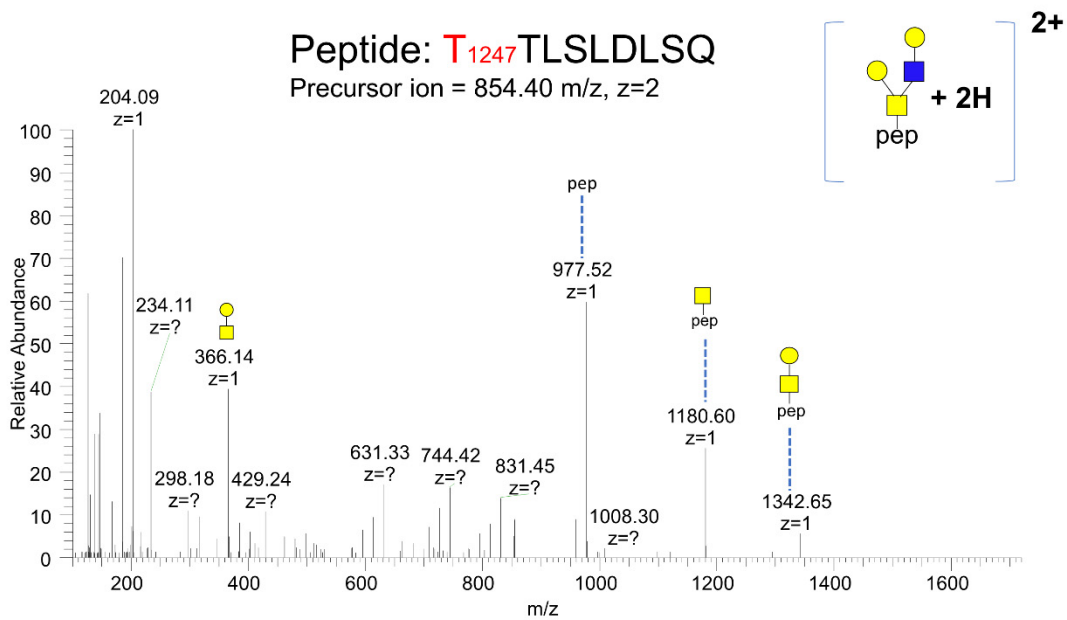

Figure S10. Tandem MS annotation of O-glycopeptide T<sub>1247</sub>TLSLDLSQ.

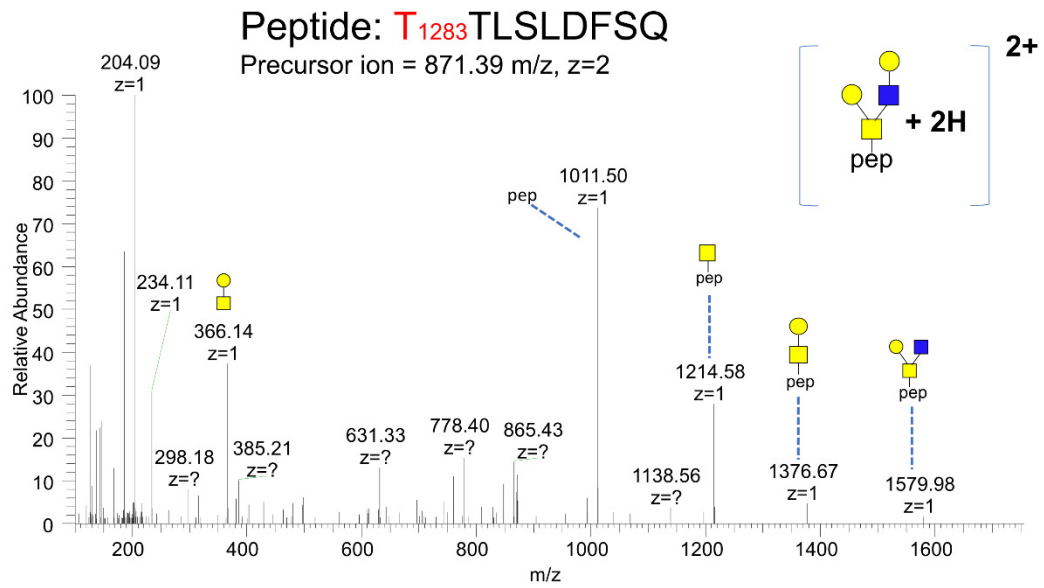

Figure S11. Tandem MS annotation of O-glycopeptide T<sub>1247</sub> T L S L D F S Q.



## IV. Identified N-glycopeptides in human FV

### 1. N554: N<sub>554</sub>KSWYLE and N<sub>554</sub>KSWYLED

| Glycan mass | $\Delta$ mass (ppm) | Structure                                       | Type           | Peptide mass | Glycopeptide mass | CFG structure |
|-------------|---------------------|-------------------------------------------------|----------------|--------------|-------------------|---------------|
| 1403.507    | 8.067               | (Hex)1(HexNAc)1(Deoxyhexose)1+(Man)3(GlcNAc)2   | hybrid/complex | 1053.477     | 2457.991          |               |
| 1565.56     | 3.714               | (Hex)2(HexNAc)1(Deoxyhexose)1+(Man)3(GlcNAc)2   | hybrid/complex | 1053.477     | 2620.044          |               |
| 1257.449    | 7.366               | (Hex)1(HexNAc)1+(Man)3(GlcNAc)2                 | hybrid/complex | 1053.477     | 2311.933          |               |
| 1378.476    | 7.575               | (Hex)3+(Man)3(GlcNAc)2                          | high_man       | 1053.477     | 2432.960          |               |
| 1581.555    | 6.878               | (Hex)3(HexNAc)1+(Man)3(GlcNAc)2                 | hybrid/complex | 1053.477     | 2636.039          |               |
| 1540.528    | 7.95                | (Hex)4+(Man)3(GlcNAc)2                          | high_man       | 1053.477     | 2595.012          |               |
| 1403.507    | 8.067               | (Hex)1(HexNAc)1(Deoxyhexose)1+(Man)3(GlcNAc)2   | hybrid/complex | 1053.477     | 2457.991          |               |
| 2432.884    | -1.829              | (HexNAc)4(Deoxyhexose)1(NeuAc)2+(Man)3(GlcNAc)2 | hybrid/complex | 938.45       | 3372.341          |               |
| 1751.624    | 16.463              | (Hex)1(HexNAc)2(NeuAc)1+(Man)3(GlcNAc)2         | hybrid/complex | 2315.111     | 4067.742          |               |
| 1954.704    | 16.061              | (Hex)1(HexNAc)3(NeuAc)1+(Man)3(GlcNAc)2         | hybrid/complex | 2331.106     | 4286.817          |               |

### 2. N382: SQHLDN<sub>382</sub>FSNQIGK and SQHLDN<sub>382</sub>FSNQIGKHYK

| Glycan mass | $\Delta$ mass (ppm) | Structure                                             | Type           | Peptide mass | Glycopeptide mass | CFG structure |
|-------------|---------------------|-------------------------------------------------------|----------------|--------------|-------------------|---------------|
| 2059.735    | -6.032              | (Hex)2(HexNAc)2(Deoxyhexose)1(NeuAc)1+(Man)3(GlcNAc)2 | hybrid/complex | 1486.716     | 3547.459          |               |
| 2060.755    | -17.238             | (Hex)2(HexNAc)2(Deoxyhexose)3+(Man)3(GlcNAc)2         | hybrid/complex | 1486.716     | 3548.478          |               |
| 1710.598    | -8.994              | (Hex)2(HexNAc)1(NeuAc)1+(Man)3(GlcNAc)2               | hybrid/complex | 1486.716     | 3198.321          |               |

|          |        |                                                                                                                                          |                |          |          |  |
|----------|--------|------------------------------------------------------------------------------------------------------------------------------------------|----------------|----------|----------|--|
| 1856.656 | -5.462 | (Hex) <sub>2</sub><br>(HexNAc) <sub>1</sub> (Deoxyhexose) <sub>1</sub><br>(NeuAc) <sub>1</sub> +(Man) <sub>3</sub> (GlcNAc) <sub>2</sub> | hybrid/complex | 1486.716 | 3344.379 |  |
| 1913.677 | -6.252 | (Hex) <sub>2</sub> (HexNAc) <sub>2</sub> (NeuAc) <sub>1</sub> +(Man) <sub>3</sub> (GlcNAc) <sub>2</sub>                                  | hybrid/complex | 1486.716 | 3401.400 |  |
| 2204.772 | 2.473  | (Hex) <sub>2</sub> (HexNAc) <sub>2</sub> (NeuAc) <sub>2</sub> +<br>(Man) <sub>3</sub> (GlcNAc) <sub>2</sub>                              | hybrid/complex | 1486.716 | 3692.495 |  |
| 1216.423 | -9.289 | (Hex) <sub>2</sub> +(Man) <sub>3</sub> (GlcNAc) <sub>2</sub>                                                                             | high_man       | 1914.934 | 3132.364 |  |
| 1565.560 | -3.963 | (Hex) <sub>2</sub> (HexNAc) <sub>1</sub> (Deoxyhexose) <sub>1</sub> +<br>(Man) <sub>3</sub> (GlcNAc) <sub>2</sub>                        | hybrid/complex | 1914.934 | 3481.501 |  |
| 1403.507 | -4.668 | (Hex) <sub>1</sub> (HexNAc) <sub>1</sub> (Deoxyhexose) <sub>1</sub> +<br>(Man) <sub>3</sub> (GlcNAc) <sub>2</sub>                        | hybrid/complex | 1914.934 | 3319.448 |  |
| 1524.534 | -5.027 | (Hex) <sub>3</sub> (Deoxyhexose) <sub>1</sub> +<br>(Man) <sub>3</sub> (GlcNAc) <sub>2</sub>                                              | high_man       | 1914.934 | 3440.475 |  |
| 1362.481 | -8.012 | (Hex) <sub>2</sub> (Deoxyhexose) <sub>1</sub> +<br>(Man) <sub>3</sub> (GlcNAc) <sub>2</sub>                                              | high_man       | 1914.934 | 3278.422 |  |
| 1524.500 | 4.398  | (HexNAc) <sub>2</sub> (Deoxyhexose) <sub>1</sub> (Phos) <sub>1</sub> +(Man) <sub>3</sub> (GlcNAc) <sub>2</sub>                           | hybrid/complex | 1914.934 | 3440.441 |  |
| 1727.613 | -4.251 | (Hex) <sub>3</sub><br>(HexNAc) <sub>1</sub> (Deoxyhexose) <sub>1</sub> +<br>(Man) <sub>3</sub> (GlcNAc) <sub>2</sub>                     | hybrid/complex | 1486.716 | 3215.336 |  |
| 2018.708 | -8.746 | (Hex) <sub>3</sub> (HexNAc) <sub>1</sub> (Deoxyhexose) <sub>1</sub> (NeuAc) <sub>1</sub> +<br>(Man) <sub>3</sub> (GlcNAc) <sub>2</sub>   | hybrid/complex | 1486.716 | 3506.431 |  |
| 1809.666 | 5.905  | (Hex) <sub>1</sub> (HexNAc) <sub>3</sub> (Deoxyhexose) <sub>1</sub> +<br>(Man) <sub>3</sub> (GlcNAc) <sub>2</sub>                        | hybrid/complex | 1914.934 | 3725.607 |  |
| 1647.613 | 5.556  | (HexNAc) <sub>3</sub> (Deoxyhexose) <sub>1</sub> +<br>(Man) <sub>3</sub> (GlcNAc) <sub>2</sub>                                           | hybrid/complex | 1914.934 | 3563.554 |  |

### 3. N938: QSN<sub>938</sub>SSK, QSN<sub>938</sub>SSKILVGRWHLASEK, and LLLKQSN<sub>938</sub>SSKILVGRWHLA SE

| Glycan mass | Δmass (ppm) | Structure                                                                                                                             | Type           | Peptide mass | Glycopeptide mass | CFG structure |
|-------------|-------------|---------------------------------------------------------------------------------------------------------------------------------------|----------------|--------------|-------------------|---------------|
| 2789.999    | 26.023      | (Hex) <sub>4</sub> (HexNAc) <sub>4</sub> (Deoxyhexose) <sub>1</sub><br>(NeuAc) <sub>1</sub> +(Man) <sub>3</sub> (GlcNAc) <sub>2</sub> | hybrid/complex | 649.303      | 3440.309          |               |
| 2935.037    | 9.129       | (Hex) <sub>4</sub> (HexNAc) <sub>4</sub> (NeuAc) <sub>2</sub> +<br>(Man) <sub>3</sub> (GlcNAc) <sub>2</sub>                           | hybrid/complex | 649.303      | 3585.347          |               |

|          |        |                                                          |                |                  |          |  |
|----------|--------|----------------------------------------------------------|----------------|------------------|----------|--|
| 2715.963 | 15.337 | (Hex)3 (HexNAc)3 (Deoxyhexose)1 (NeuAc)2+(Man)3(GlcNAc)2 | hybrid/complex | 649.303          | 3366.273 |  |
| 1938.709 | 11.046 | (Hex)1(HexNAc)3(Deoxyhexose)1(NeuAc)1+(Man)3(GlcNAc)2    | hybrid/complex | 2039.091         | 3978.807 |  |
| 1850.693 | 10.006 | (HexNAc)4(Deoxyhexose)1+(Man)3(GlcNAc)2                  | hybrid/complex | 2039.091         | 3890.791 |  |
| 2204.772 | 3.178  | (Hex)2(HexNAc)2(NeuAc)2+(Man)3(GlcNAc)2                  | hybrid/complex | 2491.427 (Glu-C) | 4697.206 |  |

#### 4. N2209: TWN<sub>2209</sub>QSIALR or FIRVIPKTWN<sub>2209</sub>QSIALR

| Glycan mass | $\Delta$ mass (ppm) | Structure                                              | Type           | Peptide mass | Glycopeptide mass | CFG structure |
|-------------|---------------------|--------------------------------------------------------|----------------|--------------|-------------------|---------------|
| 2157.783    | 14.764              | (Hex)1(HexNAc)4(NeuAc)1+(Man)3(GlcNAc)2                | hybrid/complex | 1087.577     | 3246.367          |               |
| 2319.836    | 15.852              | (Hex)2(HexNAc)4(NeuAc)1+(Man)3(GlcNAc)2                | hybrid/complex | 1087.577     | 3408.42           |               |
| 2715.963    | 26.642              | (Hex)3(HexNAc)3(Deoxyhexose)1 (NeuAc)2+(Man)3(GlcNAc)2 | hybrid/complex | 1957.126     | 4674.096          |               |
| 1590.592    | -40.97              | (HexNAc)2(Deoxyhexose)2+(Man)3(GlcNAc)2                | hybrid/complex | 1524.878     | 3116.477          |               |
| 2157.783    | -27.589             | (Hex)1(HexNAc)4(NeuAc)1+(Man)3(GlcNAc)2                | hybrid/complex | 1540.873     | 3699.663          |               |
| 1913.677    | 1.852               | (Hex)2(HexNAc)2(NeuAc)1+(Man)3(GlcNAc)2                | hybrid/complex | 1524.878     | 3439.562          |               |

#### 5. N1074: RRLKHSLVLHKSN<sub>1074</sub>E

| Glycan mass | $\Delta$ mass (ppm) | Structure                                | Type           | Peptide mass | Glycopeptide mass | CFG structure |
|-------------|---------------------|------------------------------------------|----------------|--------------|-------------------|---------------|
| 1548.545    | -3.083              | (Hex)1(HexNAc)1(NeuAc)1+ (Hex)3(HexNAc)2 | hybrid/complex | 1715.991     | 3265.543          |               |
| 1622.582    | 0.210               | (Hex)2(HexNAc)2+ (Hex)3(HexNAc)2         | hybrid/complex | 1715.991     | 3339.58           |               |

## V. N-glycosylation sites of human FV (Trypsin and Glu-C)

| Peptides                        | Modification                                   | Score    | MW         | Sites |
|---------------------------------|------------------------------------------------|----------|------------|-------|
| VSAITLVSATSTTAnMTVGPEGK         | 15,N(18O_deamidated);<br>16,M(Oxidation[M]);   | 2.18E-26 | 2253.12955 | 297   |
| NMASRPYSIYPHGVTFSPEDEVnSSFTSGR  | 24,N(18O_deamidated);                          | 3.20E-11 | 3497.57192 | 468   |
| PYSIYPHGVTFSPEDEVnSSFTSGR       | 19,N(18O_deamidated);                          | 7.74E-27 | 2938.31826 | 468   |
| GSYEHQDTDEDTAVNNWLISQPnASR      | 24,N(18O_deamidated);                          | 7.23E-26 | 3038.39905 | 977   |
| TNInSSRDPDNIAAWYLR              | 4,N(18O_deamidated);                           | 1.63E-11 | 2108.01724 | 1559  |
| TYEDDSPEWFKEDNAVQPnSSYTYVWHATER | 14,N(18O_deamidated);<br>19,N(18O_deamidated); | 2.47E-15 | 3769.61036 | 1703  |
| EDNAVQPnSSYTYVWHATER            | 8,N(18O_deamidated);                           | 1.99E-23 | 2369.04457 | 1703  |
| TWnQSIALRLELFGCDIY              | 15,C(Carbamidomethyl[C]);                      | 4.99E-19 | 2198.08299 | 2209  |
| TWnQSIALR                       | 3,N(18O_deamidated);                           | 2.49E-15 | 1090.56569 | 2209  |

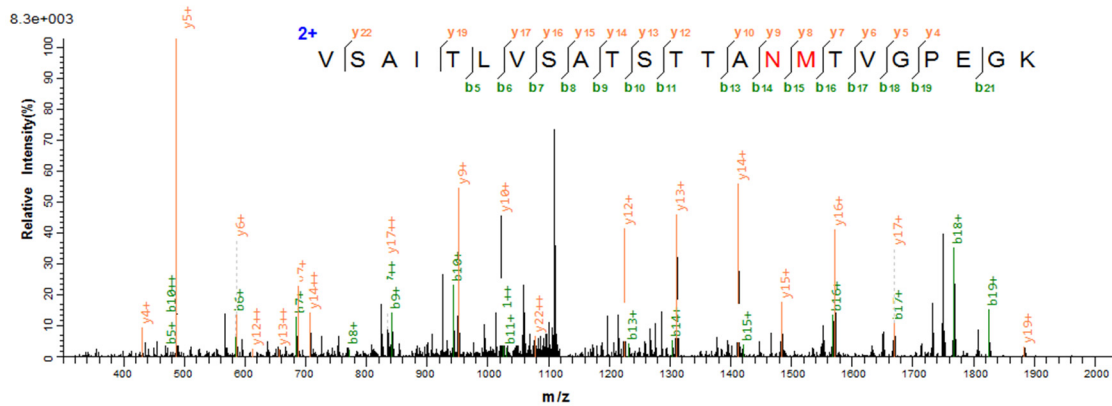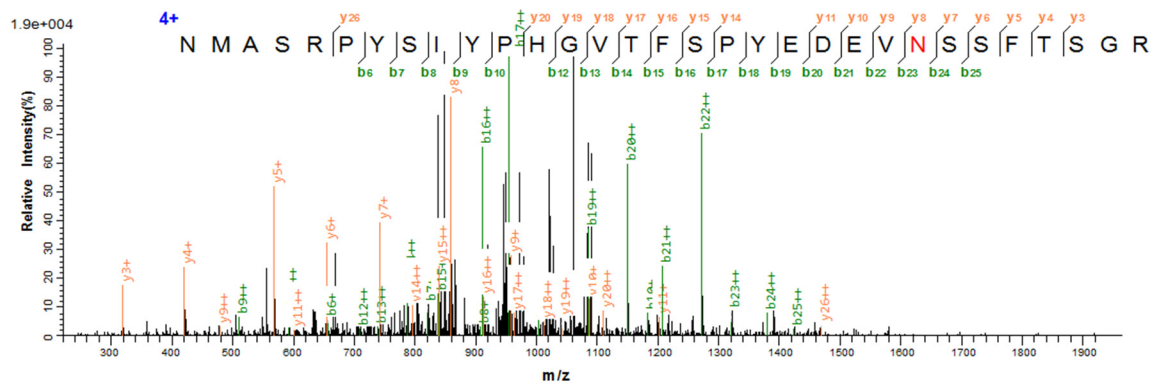

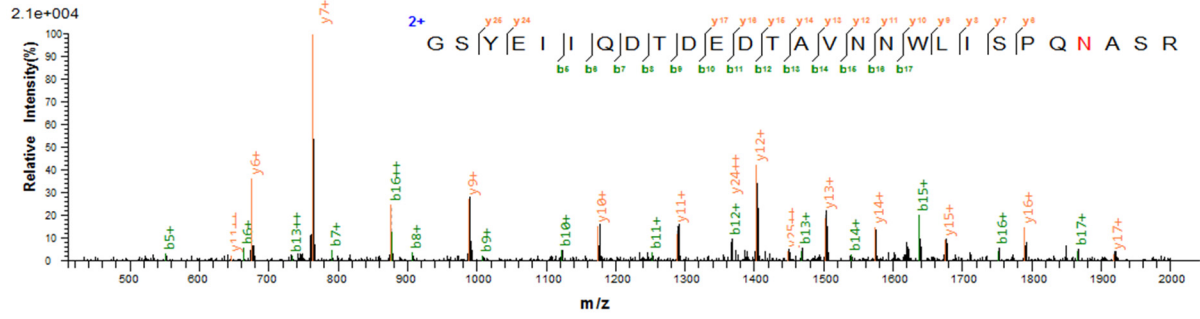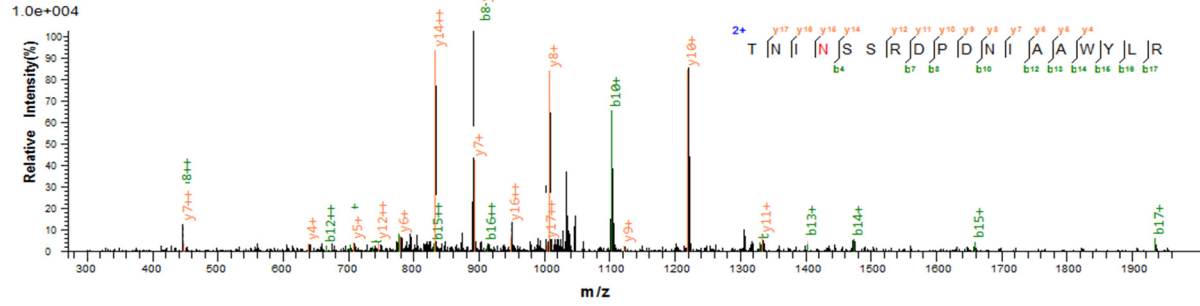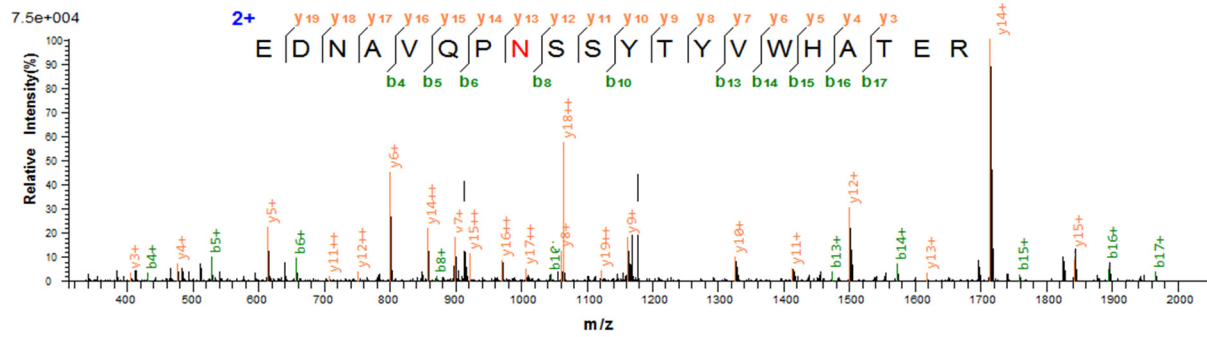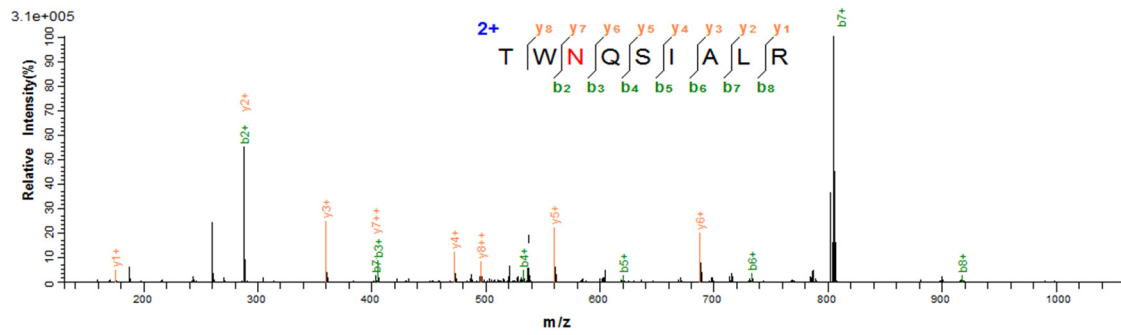

## VI. Identified O-glycopeptides in human FV

### 1. S1053: S<sub>1053</sub>EAYNTFSER

| Glycan mass | $\Delta$ mass (ppm) | Structure               | Type    | Peptide mass [M] | Glycopeptide mass | CFG structure |
|-------------|---------------------|-------------------------|---------|------------------|-------------------|---------------|
| 656.228     | 2.672               | (Hex)1(HexNAc)1(NeuAc)1 | Trypsin | 1202.52          | 1859.756          |               |
| 365.132     | 2.531               | (Hex)1(HexNAc)1         | Trypsin | 1202.52          | 1568.66           |               |

### 2. S1594: YS<sub>1594</sub>EFVQRE

| Glycan mass | $\Delta$ mass (ppm) | Structure               | Type  | Peptide mass [M] | Glycopeptide mass | CFG structure |
|-------------|---------------------|-------------------------|-------|------------------|-------------------|---------------|
| 656.228     | 1.943               | (Hex)1(HexNAc)1(NeuAc)1 | Glu-C | 1056.488         | 1713.723          |               |
| 947.323     | -2.029              | (Hex)1(HexNAc)1(NeuAc)2 | Glu-C | 1056.488         | 2004.818          |               |

### 3. 985,986 AWGESTPLANKPGK

| Glycan mass | $\Delta$ mass (ppm) | Structure                             | Type    | Peptide mass [M] | Glycopeptide mass | CFG structure |
|-------------|---------------------|---------------------------------------|---------|------------------|-------------------|---------------|
| 1823.645    | -11.764             | (Hex)3(HexNAc)3(Deoxyhexose)1(NeuAc)2 | Trypsin | 1470.747         | 3295.399          |               |
| 1677.587    | -12.691             | (Hex)3(HexNAc)3(NeuAc)2               | Trypsin | 1470.747         | 3149.341          |               |
| 1312.455    | -17.947             | (Hex)2(HexNAc)2(NeuAc)2               | Trypsin | 1470.747         | 2784.209          |               |
| 947.323     | -3.286              | (Hex)1(HexNAc)1(NeuAc)2               | Trypsin | 1454.752         | 2403.082          |               |
| 656.228     | -3.929              | (Hex)1(HexNAc)1(NeuAc)1               | Trypsin | 1454.752         | 2111.987          |               |
| 365.132     | -1.592              | (Hex)1(HexNAc)1                       | Trypsin | 1454.752         | 1820.891          |               |

### 4. T1047: T<sub>1047</sub>FHPLR

| Glycan mass | $\Delta$ mass (ppm) | Structure               | Type    | Peptide mass [M] | Glycopeptide mass | CFG structure |
|-------------|---------------------|-------------------------|---------|------------------|-------------------|---------------|
| 365.132     | 0.396               | (Hex)1(HexNAc)1         | Trypsin | 769.423          | 1135.563          |               |
| 656.228     | 3.035               | (Hex)1(HexNAc)1(NeuAc)1 | Trypsin | 769.423          | 1426.658          |               |

5. S1926: AS<sub>1926</sub>EFLGYWEPR

| Glycan mass | $\Delta$ mass (ppm) | Structure                 | Type    | Peptide mass [M] | Glycopeptide mass | CFG structure |
|-------------|---------------------|---------------------------|---------|------------------|-------------------|---------------|
| 656.228     | -0.951              | (Hex)1 (HexNAc)1 (NeuAc)1 | Trypsin | 1353.635         | 2010.871          |               |
| 365.132     | -0.951              | (Hex)1(HexNAc)1           | Trypsin | 1353.635         | 1719.775          |               |

6. S1150 SSS<sub>1150</sub>PELSEMLEYDR

| Glycan mass | $\Delta$ mass (ppm) | Structure                              | Type    | Peptide mass [M] | Glycopeptide mass | CFG structure |
|-------------|---------------------|----------------------------------------|---------|------------------|-------------------|---------------|
| 947.323     | 0.131               | (Hex)1(HexNAc)1(NeuAc)2                | Trypsin | 1641.719         | 2590.049          |               |
| 656.228     | 2.497               | (Hex)1(HexNAc)1(NeuAc)1                | Trypsin | 1641.719         | 2298.954          |               |
| 203.079     | 1.484               | HexNAc                                 | Trypsin | 1641.719         | 1845.805          |               |
| 1126.391    | 15.326              | (Hex)3(HexNAc)1(Deoxyhexose)1 (NeuAc)1 | Trypsin | 1641.719         | 2769.117          |               |
| 365.132     | 1.663               | (Hex)1(HexNAc)1                        | Trypsin | 1641.719         | 2007.858          |               |
| 730.264     | 3.692               | (Hex)2(HexNAc)2                        | Trypsin | 1657.714         | 2388.985          |               |

7. T805 APHQATT<sub>805</sub>AGSPLR

| Glycan mass | $\Delta$ mass (ppm) | Structure                              | Type    | Peptide mass [M] | Glycopeptide mass | CFG structure |
|-------------|---------------------|----------------------------------------|---------|------------------|-------------------|---------------|
| 1021.36     | -6.011              | (Hex)2(HexNAc)2(NeuAc)1                | Trypsin | 1520.77          | 2543.137          |               |
| 859.307     | -3.145              | (Hex)1(HexNAc)2(NeuAc)1                | Trypsin | 1520.77          | 2381.084          |               |
| 1167.418    | -0.248              | (Hex)2(HexNAc)2 (Deoxyhexose)1(NeuAc)1 | Trypsin | 1520.77          | 2689.195          |               |
| 203.079     | -2.196              | (HexNAc)1                              | Trypsin | 1520.77          | 1724.856          |               |
| 365.132     | 1.436               | (Hex)1(HexNAc)1                        | Trypsin | 1520.77          | 1886.909          |               |
| 656.228     | -3.300              | (Hex)1(HexNAc)1(NeuAc)1                | Trypsin | 1520.77          | 2178.005          |               |
| 1021.36     | -1.017              | (Hex)2(HexNAc)2(NeuAc)1                | Trypsin | 1520.77          | 2543.137          |               |
| 1312.455    | 2.657               | (Hex)2(HexNAc)2(NeuAc)2                | Trypsin | 1520.77          | 2834.232          |               |

8. S1044 HTHHAPLS<sub>1044</sub>PR

| Glycan mass | $\Delta$ mass (ppm) | Structure                           | Type    | Peptide mass [M] | Glycopeptide mass | CFG structure |
|-------------|---------------------|-------------------------------------|---------|------------------|-------------------|---------------|
| 656.228     | -0.751              | (Hex)1(HexNAc)1(NeuAc) <sub>1</sub> | Trypsin | 1151.595         | 1808.83           |               |
| 365.132     | -1.686              | (Hex)1(HexNAc)1                     | Trypsin | 1151.595         | 1517.727          |               |
| 203.079     | 1.088               | (HexNAc)1                           | Trypsin | 1151.595         | 1354.674          |               |

9. S1053 KHTHHAPLSPRTFHPLRS<sub>1053</sub>E

| Glycan mass | $\Delta$ mass (ppm) | Structure                           | Type  | Peptide mass [M] | Glycopeptide mass | CFG structure |
|-------------|---------------------|-------------------------------------|-------|------------------|-------------------|---------------|
| 656.228     | -0.712              | (Hex)1(HexNAc)1(NeuAc) <sub>1</sub> | Glu-C | 2247.177         | 2904.413          |               |

10. T1211 LSHT<sub>1211</sub>TLSP E

| Glycan mass | $\Delta$ mass (ppm) | Structure                           | Type  | Peptide mass [M] | Glycopeptide mass | CFG structure |
|-------------|---------------------|-------------------------------------|-------|------------------|-------------------|---------------|
| 656.228     | 0.004               | (Hex)1(HexNAc)1(NeuAc) <sub>1</sub> | Glu-C | 983.492          | 1640.727          |               |
| 947.323     | 2.707               | (Hex)1(HexNAc)1(NeuAc) <sub>2</sub> | Glu-C | 983.492          | 1931.822          |               |

## 11. 1298-1306 LSHMTLSPE

| Glycan mass | $\Delta$ mass (ppm) | Structure                           | Type  | Peptide mass [M] | Glycopeptide mass | CFG structure |
|-------------|---------------------|-------------------------------------|-------|------------------|-------------------|---------------|
| 656.228     | 1.897               | (Hex)1(HexNAc)1(NeuAc) <sub>1</sub> | Glu-C | 1013.485         | 1670.72           |               |
| 947.323     | 2.737               | (Hex)1(HexNAc)1(NeuAc) <sub>2</sub> | Glu-C | 1013.485         | 1961.815          |               |

12. T1238 LSHT<sub>1238</sub>TLSPD

| Glycan mass | $\Delta$ mass (ppm) | Structure                           | Type  | Peptide mass [M] | Glycopeptide mass | CFG structure |
|-------------|---------------------|-------------------------------------|-------|------------------|-------------------|---------------|
| 947.323     | 1.788               | (Hex)1(HexNAc)1(NeuAc) <sub>2</sub> | Glu-C | 969.477          | 1917.807          |               |

13. T1283 LSHT<sub>1283</sub>TLSLD

| Glycan mass | $\Delta$ mass (ppm) | Structure                           | Type  | Peptide mass [M] | Glycopeptide mass | CFG structure |
|-------------|---------------------|-------------------------------------|-------|------------------|-------------------|---------------|
| 947.323     | 1.619               | (Hex)1(HexNAc)1(NeuAc) <sub>2</sub> | Glu-C | 985.508          | 1933.838          |               |
